# Supplementary material
Source: Springer Nature journal article supplement (https://www.springermedizin.de/resource/supplementary/13058_2013_3598_MOESM7_ESM.pdf/9703924)

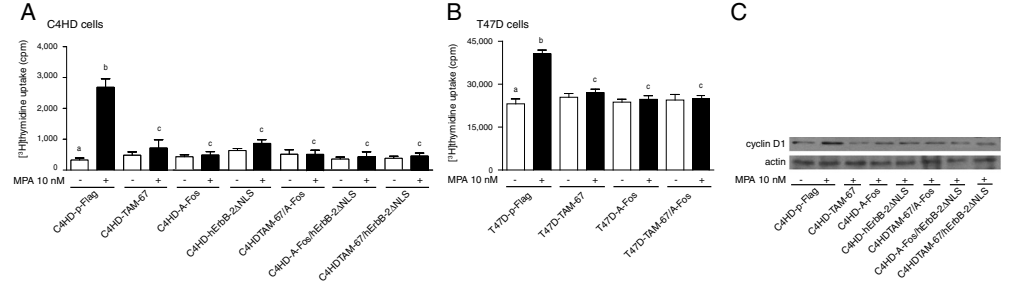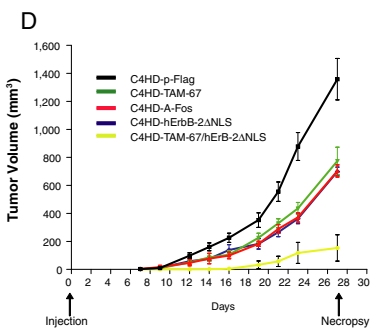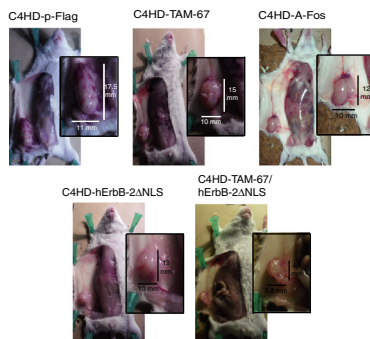

**E**

| Treatment               | Mean tumor vol (mm <sup>3</sup> ) ± SEM | Growth rate <sup>a</sup> (mm <sup>3</sup> /day) ± SEM | % Growth inhibition | Delay in tumor growth (days) |
|-------------------------|-----------------------------------------|-------------------------------------------------------|---------------------|------------------------------|
| C4HD-p-Flag             | 1,358 ± 147*                            | 64.27 ± 4.34*                                         |                     |                              |
| C4HD-TAM-67             | 703 ± 43 <sup>#b</sup>                  | 31.33 ± 3.00 <sup>#b</sup>                            | 48 <sup>d</sup> e   | 4.8 <sup>g</sup>             |
| C4HD-A-Fos              | 774 ± 98 <sup>#b</sup>                  | 35.58 ± 2.84 <sup>#b</sup>                            | 43 <sup>d</sup> e   | 5.2 <sup>g</sup>             |
| C4HD-hErbB-2ΔNLS        | 699 ± 31 <sup>#b</sup>                  | 30.76 ± 2.39 <sup>#b</sup>                            | 48 <sup>d</sup> e   | 5.2 <sup>g</sup>             |
| C4HD-TAM-67/hErbB-2ΔNLS | 153 ± 93 <sup>#c</sup>                  | 7.52 ± 2.01 <sup>#c</sup>                             | 88 <sup>d</sup> f   | 13.2 <sup>g</sup>            |

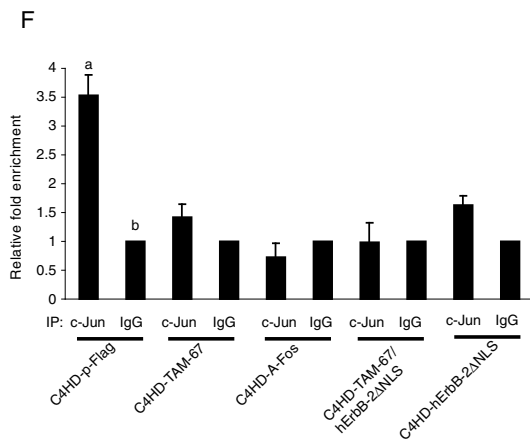

Supplement: MOESM7 [file 9703924]
